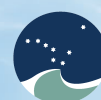

## Original Article

# Marine conservation of multispecies and multi-use areas with various conservation objectives and targets

Mara Schmiing\*, Hugo Diogo, Ricardo Serrão Santos, and Pedro Afonso

*Department of Oceanography and Fisheries, Centre of IMAR, University of the Azores, LARSyS, Rua Prof. Doutor Frederico Machado 4, 9901-862 Horta (Azores), Portugal*

\*Corresponding author: tel: +351 292 200 400; fax: +351 292 200 411; e-mail: [mschmiing@uac.pt](mailto:mschmiing@uac.pt)

Schmiing, M., Diogo, H., Serrão Santos, R., and Afonso, P. Marine conservation of multispecies and multi-use areas with various conservation objectives and targets. – ICES Journal of Marine Science, 72: 851–862.

Received 15 January 2014; revised 19 September 2014; accepted 24 September 2014; advance access publication 15 October 2014.

Marine spatial management is an important step in regulating the sustainable use of marine resources and preserving habitats and species. The systematic conservation planning software “Marxan” was used to analyse the effect of different conservation objectives and targets on the design of a network of marine protected areas around two islands of the Azores archipelago, Northeast Atlantic. The analyses integrated spatial patterns of the abundance and reproductive potential of multispecies, the vulnerability of fish to fishing, habitat type, algae biotopes, and socio-economic costs and benefits (including fishing effort and recreational activities). Three scenarios focused on fisheries-related objectives (“fisheries scenarios”, FSs) and three on multiple-use and biodiversity conservation objectives (“biodiversity scenarios”, BSs), respectively. Three different protection targets were compared for each set, the existing, minimum, and maximum levels of protection, whereas conservation features were weighted according to their biologically/ecologically functioning. Results provided contrasting solutions for site selection and identified potential gaps in the existing design. The influence of the conservation objective on site selection was most evident when minimum target levels were applied. Otherwise, solutions for FSs and BSs were very similar and mostly shaped by the protection level. More important, BSs that considered opportunity cost and benefits achieved conservation targets more cost-efficiently. The presented systematic approach ensures that targets for habitats with high fish abundance, fecundity, and vulnerability are achieved efficiently. It should be of high applicability for adaptive management processes to improve the effectiveness of existing spatial management practices, in particular when fishing and leisure activities coexist, and suggest that decision-makers should account for multiple users’ costs and benefits when designing and implementing marine reserve networks.

**Keywords:** biodiversity surrogates, fisheries management, marine spatial management, Marxan, socio-economic data, systematic conservation planning.

## Introduction

There is growing awareness that the excessive human use of marine resources has contributed to significant changes in the marine ecosystem. Decreasing biodiversity, declining fish stocks, and habitat loss are among the most visible consequences (Pauly *et al.*, 2005; Sala and Knowlton, 2006; Coll *et al.*, 2010). Marine protected areas (MPAs) can be implemented to compensate for these negative impacts and as a tool to maintain biodiversity, recover fish stocks, and improve habitat quality (Russ, 2002; Gladstone, 2007; Palumbi *et al.*, 2009). Their classification varies from the regulation of particular human activities or the protection of single species to the prohibition of any human activity (IUCN, 1994). Marine

reserves (MRs), the strictest approach, are considered as most effective for the maintenance of biodiversity and as fisheries management tool (Russ, 2002; Vandeperre *et al.*, 2011; Sala *et al.*, 2013). Protected fish populations are believed to recover from overexploitation and, subsequently, support adjacent fisheries via larval, juvenile, and adult spillover (Goñi *et al.*, 2008; Stobart *et al.*, 2009; Harrison *et al.*, 2012). Studies have shown that a network of several protected zones is the most effective (Gaines *et al.*, 2010), if the individual sites are viable/adequate, representative, replicated, and connected with each other (OSPAR, 2007; Ardron, 2008).

Despite an increasing number of studies on reserve size, spacing, configuration (Kaplan and Botsford, 2005; Little *et al.*, 2005;

Vandeperre *et al.*, 2011), ontogenetic fish migrations (Afonso *et al.*, 2008a; Compton *et al.*, 2012), and larval dispersal (Fontes *et al.*, 2009; Harrison *et al.*, 2012), the optimal reserve design remains challenging (Gaines *et al.*, 2010; Agardy *et al.*, 2011). A multitude of environmental, biological, ecological, and management aspects has to be considered. Design tasks are substantially supported by the increasing availability and quality of information of species distribution and habitat maps, including predictive distribution models in data-limited situations (e.g. Guisan and Zimmermann, 2000; Schmiing *et al.*, 2013).

Systematic conservation planning is a structured approach to locate, design, and manage MRs (or other conservation areas) that represent, protect, and promote the persistence of biodiversity (Margules and Pressey, 2000). It is an efficient, flexible, defendable, and transparent process that uses the principle of complementary (i.e. priority areas achieve conservation objectives collectively; Margules and Pressey, 2000; Ardrón 2008; Watson *et al.*, 2011). Systematic conservation planning involves the identification of clear objectives, the compilation of suitable data, review of existing and selection of additional conservation areas, as well as their implementation and monitoring (Margules and Pressey, 2000; Ardrón 2008). Site selection is supported by decision support software that achieves conservation objectives in a cost-efficient manner; biological/ecological, habitat, and socio-economic data are integrated to produce near-optimal solutions for reserve networks (Ardrón 2008; Game and Grantham, 2008).

In the present study, systematic conservation planning is used to assess an existing, partly opportunistically designed MPA network, and to generate solutions for alternative networks in two neighbouring islands of the Azores archipelago, Northeast Atlantic. This case study addresses the challenges of marine spatial management in spatially limited and isolated coastal habitats (Santos *et al.*, 1995) that are extensively used by local fisheries and the leisure industry (Diogo and Pereira, 2013, 2014; Pham *et al.*, 2013; Ressurreição and Giacomello, 2013). A set of solutions for reserve networks with either fisheries management or multiple-use (including non-extractive, recreational activities) and biodiversity conservation objectives is produced systematically by integrating (i) spatial patterns of abundances, fecundity, and spawning biomass of multi-species, (ii) the vulnerability of fish to fishing, (iii) different habitats and algae biotopes, (iv) the distribution of socio-economic values, and (v) well-defined conservation objectives and targets. The presented approach supports the planning of conservation networks in any marine ecosystem, particularly when leisure and fishing activities coexist.

## Material and methods

### Study area

The study area comprises coastal habitats down to the 40 m isobath around Faial and Pico Islands, archipelago of the Azores, Northeast Atlantic (Figure 1). It includes three small offshore reefs that lay inside the shallow channel between the two islands, the “Faial–Pico channel”. Island Natural Parks (INPs) of both islands were declared in 2008, including marine and terrestrial sites that follow the classification of the International Union for Conservation of Nature (IUCN). These areas integrate previously designated regional, national, NATURA2000, and OSPAR MPAs. The single “no-take” zone (IUCN category I) in the study area encompasses two adjacent small sunken calderas (8 ha), the Caldeirinhas MR in Faial Island, where only previously approved scientific activities

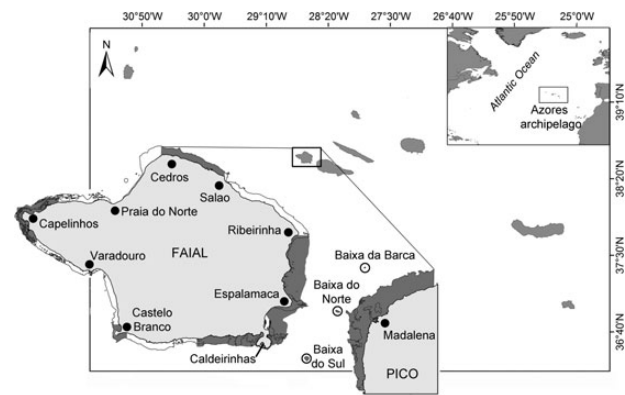

**Figure 1.** Map of the study area in the Azores archipelago (NE Atlantic), including three offshore reefs located in the channel between the islands of Faial and Pico. Dark grey shaded areas show the existing MPA network and black lines outline rocky habitats down to 40 m depth.

are permitted. Five other marine zones correspond to IUCN category VI but have no uniform legislation for human, extractive activities. For example, mineral exploration and extraction is conditional to authorization in just one of these zones, spearfishing is prohibited in three zones, and limpet collection in all five IUCN VI zones. Management plans are still missing for both INPs. Marine leisure activities occur in the entire study area (e.g. scuba diving, glass-bottom boat observation, whale watching, etc.).

### Conservation features

Conservation features are species, habitats, or other ecological features of interest for conservation, which are given a conservation target (i.e. the amount to be included within a reserve network, Game and Grantham, 2008; Ball *et al.*, 2009). The spatial distribution of single species, the entire fish assemblage, substrate type, and biotopes were used as conservation features (Table 1). The distribution of “species features” was based on predictive species distribution maps of reef fish, derived from statistic modelling (generalized additive models, GAMs; Schmiing *et al.*, 2013, Schmiing, unpublished data). The models were based on data from underwater visual fish counts (UVCs) that identified and counted fish and grouped all individuals into four species-specific size classes (small, medium, large, very large, see Schmiing *et al.*, 2013).

Seven maps considered the relative abundance (i.e. the percentage of the maximum predicted abundance) of commercial (*Diplodus sargus*, *Labrus bergylta*, *Serranus atricauda*, *Sparisoma cretense*) and non-commercial fish species (*Abudefduf luridus*, *Coris julis*, *Sarpa salpa*), including all size classes (Schmiing *et al.*, 2013, unpublished data). Two additional maps described the probability of the presence of the non-commercial species *Symphodus caeruleus* and the commercial *Trachurus picturatus* (on a scale from 0 to 1). No sound statistic model could be produced for the abundance of these two species, thus count data were converted to presence–absence and binomial models were applied (Schmiing *et al.*, 2013).

In addition, the relative spawning biomass of mature individuals of each of the four commercial species was modelled and predicted (Schmiing, unpublished data). For this purpose, it was defined that the three largest size classes encompass mature individuals. Size classes were converted to the mean sizes in centimetres and, subsequently, the biomass was calculated based on species-specific

**Table 1.** Overview of the spatial conservation features and their use in conservation scenarios.

| Category                                                  | Conservation feature                           | Value    | Scenario | Target: existing MPA (%)   | Target: minimum (%) | Target: maximum (%) |
|-----------------------------------------------------------|------------------------------------------------|----------|----------|----------------------------|---------------------|---------------------|
| Habitat                                                   | Rock                                           | Presence | FS, BS   | 62 (21 km <sup>2</sup> )   | 10                  | 30                  |
|                                                           | Sediment                                       | Presence | BS       | 55 (14 km <sup>2</sup> )   | 10                  | 30                  |
| Biotope                                                   | Articulated corallinaceae                      | Presence | BS       | 66 (19 km <sup>2</sup> )   | 10                  | 30                  |
|                                                           | <i>Codium eslisabethae</i>                     | Presence | BS       | 99 (0.03 km <sup>2</sup> ) | 10                  | 30                  |
|                                                           | <i>Dictyota</i> spp.                           | Presence | BS       | 63 (16 km <sup>2</sup> )   | 10                  | 30                  |
|                                                           | <i>Halopteris flicina</i>                      | Presence | BS       | 70 (12 km <sup>2</sup> )   | 10                  | 30                  |
|                                                           | <i>Padina pavonica</i>                         | Presence | BS       | 71 (8 km <sup>2</sup> )    | 10                  | 30                  |
|                                                           | <i>Zonaria tournefortii</i>                    | Presence | BS       | 70 (12 km <sup>2</sup> )   | 10                  | 30                  |
| Assemblage                                                | IV, low                                        | 35–43    | FS       | 41 (6 km <sup>2</sup> )    | 5                   | 15                  |
|                                                           | IV, medium                                     | > 43–47  | FS       | 72 (16 km <sup>2</sup> )   | 10                  | 30                  |
|                                                           | IV, high                                       | > 47–51  | FS       | 65 (12 km <sup>2</sup> )   | 15                  | 45                  |
| Species: abundance<br>(all individuals)                   | <i>Abudefduf luridus</i> <sup>NC</sup> , low   | < 10%    | BS       | 60 (27 km <sup>2</sup> )   | 0                   | 0                   |
|                                                           | <i>A. luridus</i> <sup>NC</sup> , middle       | 10–25%   | BS       | 68 (6 km <sup>2</sup> )    | 5                   | 15                  |
|                                                           | <i>A. luridus</i> <sup>NC</sup> , high         | > 25–50% | BS       | 84 (1 km <sup>2</sup> )    | 10                  | 30                  |
|                                                           | <i>A. luridus</i> <sup>NC</sup> , very high    | > 50%    | BS       | 97 (0.1 km <sup>2</sup> )  | 15                  | 45                  |
|                                                           | <i>Coris julis</i> <sup>NC</sup> , low         | < 10%    | BS       | 58 (17 km <sup>2</sup> )   | 0                   | 0                   |
|                                                           | <i>C. julis</i> <sup>NC</sup> , middle         | 10–25%   | BS       | 64 (6 km <sup>2</sup> )    | 5                   | 15                  |
|                                                           | <i>C. julis</i> <sup>NC</sup> , high           | > 25–50% | BS       | 59 (6 km <sup>2</sup> )    | 10                  | 30                  |
|                                                           | <i>C. julis</i> <sup>NC</sup> , very high      | > 50%    | BS       | 82 (5 km <sup>2</sup> )    | 15                  | 45                  |
|                                                           | <i>Diplodus sargus</i> <sup>C</sup> , low      | < 10%    | FS, BS   | 58 (25 km <sup>2</sup> )   | 0                   | 0                   |
|                                                           | <i>D. sargus</i> <sup>C</sup> , middle         | 10–25%   | FS, BS   | 75 (7 km <sup>2</sup> )    | 5                   | 15                  |
|                                                           | <i>D. sargus</i> <sup>C</sup> , high           | > 25–50% | FS, BS   | 73 (2 km <sup>2</sup> )    | 10                  | 30                  |
|                                                           | <i>D. sargus</i> <sup>C</sup> , very high      | > 50%    | FS, BS   | 98 (0.3 km <sup>2</sup> )  | 15                  | 45                  |
|                                                           | <i>Labrus bergylta</i> <sup>C</sup> , low      | < 10%    | FS, BS   | 63 (31 km <sup>2</sup> )   | 0                   | 0                   |
|                                                           | <i>L. bergylta</i> <sup>C</sup> , middle       | 10–25%   | FS, BS   | 52 (3 km <sup>2</sup> )    | 5                   | 15                  |
|                                                           | <i>L. bergylta</i> <sup>C</sup> , high         | > 25–50% | FS, BS   | 49 (0.4 km <sup>2</sup> )  | 10                  | 30                  |
|                                                           | <i>L. bergylta</i> <sup>C</sup> , very high    | > 50%    | FS, BS   | 37 (0.1 km <sup>2</sup> )  | 15                  | 45                  |
|                                                           | <i>Sarpa salpa</i> <sup>NC</sup> , low         | < 10%    | BS       | 61 (25 km <sup>2</sup> )   | 0                   | 0                   |
|                                                           | <i>S. salpa</i> <sup>NC</sup> , middle         | 10–25%   | BS       | 70 (4 km <sup>2</sup> )    | 5                   | 15                  |
|                                                           | <i>S. salpa</i> <sup>NC</sup> , high           | > 25–50% | BS       | 73 (3 km <sup>2</sup> )    | 10                  | 30                  |
|                                                           | <i>S. salpa</i> <sup>NC</sup> , very high      | > 50%    | BS       | 51 (3 km <sup>2</sup> )    | 15                  | 45                  |
|                                                           | <i>Serranus atricauda</i> <sup>C</sup> , low   | < 10%    | FS, BS   | 60 (16 km <sup>2</sup> )   | 0                   | 0                   |
|                                                           | <i>S. atricauda</i> <sup>C</sup> , middle      | 10–25%   | FS, BS   | 62 (8 km <sup>2</sup> )    | 5                   | 15                  |
|                                                           | <i>S. atricauda</i> <sup>C</sup> , high        | > 25–50% | FS, BS   | 65 (7 km <sup>2</sup> )    | 10                  | 30                  |
|                                                           | <i>S. atricauda</i> <sup>C</sup> , very high   | > 50%    | FS, BS   | 70 (3 km <sup>2</sup> )    | 15                  | 45                  |
|                                                           | <i>Sparisoma cretense</i> <sup>C</sup> , low   | < 10%    | FS, BS   | 61 (31 km <sup>2</sup> )   | 0                   | 0                   |
|                                                           | <i>S. cretense</i> <sup>C</sup> , middle       | 10–25%   | FS, BS   | 69 (2 km <sup>2</sup> )    | 5                   | 15                  |
|                                                           | <i>S. cretense</i> <sup>C</sup> , high         | > 25–50% | FS, BS   | 73 (1 km <sup>2</sup> )    | 10                  | 30                  |
|                                                           | <i>S. cretense</i> <sup>C</sup> , very high    | > 50%    | FS, BS   | 94 (0.1 km <sup>2</sup> )  | 15                  | 45                  |
| Species: probability of<br>presence (all individuals)     | <i>Symphodus caeruleus</i> <sup>NC</sup> , low | < 10%    | BS       | 66 (19 km <sup>2</sup> )   | 0                   | 0                   |
|                                                           | <i>S. caeruleus</i> <sup>NC</sup> , middle     | 10–25%   | BS       | 54 (4 km <sup>2</sup> )    | 5                   | 15                  |
|                                                           | <i>S. caeruleus</i> <sup>NC</sup> , high       | > 25–50% | BS       | 53 (3 km <sup>2</sup> )    | 10                  | 30                  |
|                                                           | <i>S. caeruleus</i> <sup>NC</sup> , very high  | > 50%    | BS       | 62 (8 km <sup>2</sup> )    | 15                  | 45                  |
|                                                           | <i>Trachurus picturatus</i> <sup>C</sup> , low | < 10%    | FS, BS   | 57 (14 km <sup>2</sup> )   | 0                   | 0                   |
|                                                           | <i>T. picturatus</i> <sup>C</sup> , middle     | 10–25%   | FS, BS   | 59 (9 km <sup>2</sup> )    | 5                   | 15                  |
|                                                           | <i>T. picturatus</i> <sup>C</sup> , high       | > 25–50% | FS, BS   | 72 (9 km <sup>2</sup> )    | 10                  | 30                  |
|                                                           | <i>T. picturatus</i> <sup>C</sup> , very high  | > 50%    | FS, BS   | 81 (3 km <sup>2</sup> )    | 15                  | 45                  |
| Species: spawning biomass<br>(mature individuals)         | <i>D. sargus</i> <sup>C</sup> , low            | < 10%    | FS       | 56 (19 km <sup>2</sup> )   | 0                   | 0                   |
|                                                           | <i>D. sargus</i> <sup>C</sup> , middle         | 10–25%   | FS       | 71 (9 km <sup>2</sup> )    | 5                   | 15                  |
|                                                           | <i>D. sargus</i> <sup>C</sup> , high           | > 25–50% | FS       | 74 (4 km <sup>2</sup> )    | 10                  | 30                  |
|                                                           | <i>D. sargus</i> <sup>C</sup> , very high      | > 50%    | FS       | 85 (2 km <sup>2</sup> )    | 15                  | 45                  |
|                                                           | <i>S. atricauda</i> <sup>C</sup> , low         | < 10%    | FS       | 62 (15 km <sup>2</sup> )   | 0                   | 0                   |
|                                                           | <i>S. atricauda</i> <sup>C</sup> , middle      | 10–25%   | FS       | 56 (10 km <sup>2</sup> )   | 5                   | 15                  |
|                                                           | <i>S. atricauda</i> <sup>C</sup> , high        | > 25–50% | FS       | 66 (6 km <sup>2</sup> )    | 10                  | 30                  |
|                                                           | <i>S. atricauda</i> <sup>C</sup> , very high   | > 50%    | FS       | 79 (4 km <sup>2</sup> )    | 15                  | 45                  |
| Species: probability of presence<br>of mature individuals | <i>L. bergylta</i> <sup>C</sup> , low          | < 10%    | FS       | 61 (15 km <sup>2</sup> )   | 0                   | 0                   |
|                                                           | <i>L. bergylta</i> <sup>C</sup> , middle       | 10–25%   | FS       | 69 (5 km <sup>2</sup> )    | 5                   | 15                  |
|                                                           | <i>L. bergylta</i> <sup>C</sup> , high         | > 25–50% | FS       | 62 (7 km <sup>2</sup> )    | 10                  | 30                  |
|                                                           | <i>L. bergylta</i> <sup>C</sup> , very high    | > 50%    | FS       | 61 (8 km <sup>2</sup> )    | 15                  | 45                  |
|                                                           | <i>S. cretense</i> <sup>C</sup> , low          | < 10%    | FS       | 61 (14 km <sup>2</sup> )   | 0                   | 0                   |
|                                                           | <i>S. cretense</i> <sup>C</sup> , middle       | 10–25%   | FS       | 58 (2 km <sup>2</sup> )    | 5                   | 15                  |

Continued

Table 1. Continued

| Category                                      | Conservation feature                         | Value   | Scenario | Target: existing MPA (%)  | Target: minimum (%) | Target: maximum (%) |
|-----------------------------------------------|----------------------------------------------|---------|----------|---------------------------|---------------------|---------------------|
| Species: potential fecundity (mature females) | <i>S. cretense</i> <sup>C</sup> , high       | >25–50% | FS       | 58 (4 km <sup>2</sup> )   | 10                  | 30                  |
|                                               | <i>S. cretense</i> <sup>C</sup> , very high  | >50%    | FS       | 66 (13 km <sup>2</sup> )  | 15                  | 45                  |
|                                               | <i>D. sargus</i> <sup>C</sup> , low          | <10%    | FS       | 56 (18 km <sup>2</sup> )  | 0                   | 0                   |
|                                               | <i>D. sargus</i> <sup>C</sup> , middle       | 10–25%  | FS       | 62 (8 km <sup>2</sup> )   | 5                   | 15                  |
|                                               | <i>D. sargus</i> <sup>C</sup> , high         | >25–50% | FS       | 77 (5 km <sup>2</sup> )   | 10                  | 30                  |
|                                               | <i>D. sargus</i> <sup>C</sup> , very high    | >50%    | FS       | 89 (3 km <sup>2</sup> )   | 15                  | 45                  |
|                                               | <i>L. bergylta</i> <sup>C</sup> , low        | <10%    | FS       | 61 (16 km <sup>2</sup> )  | 0                   | 0                   |
|                                               | <i>L. bergylta</i> <sup>C</sup> , middle     | 10–25%  | FS       | 70 (4 km <sup>2</sup> )   | 5                   | 15                  |
|                                               | <i>L. bergylta</i> <sup>C</sup> , high       | >25–50% | FS       | 63 (7 km <sup>2</sup> )   | 10                  | 30                  |
|                                               | <i>L. bergylta</i> <sup>C</sup> , very high  | >50%    | FS       | 59 (8 km <sup>2</sup> )   | 15                  | 45                  |
|                                               | <i>S. atricauda</i> <sup>C</sup> , low       | <10%    | FS       | 60 (20 km <sup>2</sup> )  | 0                   | 0                   |
|                                               | <i>S. atricauda</i> <sup>C</sup> , middle    | 10–25%  | FS       | 58 (7 km <sup>2</sup> )   | 5                   | 15                  |
|                                               | <i>S. atricauda</i> <sup>C</sup> , high      | >25–50% | FS       | 71 (4 km <sup>2</sup> )   | 10                  | 30                  |
|                                               | <i>S. atricauda</i> <sup>C</sup> , very high | >50%    | FS       | 80 (3 km <sup>2</sup> )   | 15                  | 45                  |
|                                               | <i>S. cretense</i> <sup>C</sup> , low        | <10%    | FS       | 62 (31 km <sup>2</sup> )  | 0                   | 0                   |
|                                               | <i>S. cretense</i> <sup>C</sup> , middle     | 10–25%  | FS       | 70 (3 km <sup>2</sup> )   | 5                   | 15                  |
|                                               | <i>S. cretense</i> <sup>C</sup> , high       | >25–50% | FS       | 58 (1 km <sup>2</sup> )   | 10                  | 30                  |
|                                               | <i>S. cretense</i> <sup>C</sup> , very high  | >50%    | FS       | 79 (0.1 km <sup>2</sup> ) | 15                  | 45                  |

Two objectives were analysed, FSs and BSs, each considering three different protection target levels. The area (km<sup>2</sup>) of each conservation feature in the existing MPAs is shown in parentheses. Values of all species conservation features are expressed as percentage of the maximum predicted value of the species' abundance/probability of presence/spawning biomass/potential fecundity. IV, index of the intrinsic vulnerability of (commercial) fish to fishing. C, commercial, NC, non-commercial.

length–weight relationships (Morato *et al.*, 2001). Model predictions were converted to a relative scale (i.e. the percentage of the maximum predicted biomass). For two species (*L. bergylta*, *S. cretense*), it was only possible to model and predict the probability of the presence of mature individuals on a scale from 0 to 1.

Additional species features considered the potential fecundity of mature females of each of the four commercial species (Schmiing, unpublished data). The number of females in UVCs was estimated via sex ratios from local populations, whenever possible per size class (Morato *et al.*, 2003; unpublished data). GAMs were applied to produce predictive distribution maps of the potential fecundity on a relative scale (i.e. the percentage of the maximum predicted fecundity).

Predictive maps of all species features were on a scale from 0 to 100% of the predicted maximum abundance or from 0 to 1 for maps resulting from presence–absence models, respectively. Each species feature was then categorized in four different classes (low: <10%, middle: >10–25%, high: >25–50%, very high: >50% for relative abundances or low: <0.1, middle: 0.1–0.25, high: >0.25–0.50, very high: >0.50 for the probability of presence, respectively; Table 1, adapted from Schmiing *et al.*, 2013).

A predictive distribution map of the intrinsic vulnerability of fish to fishing was used as “assemblage feature”. This map resulted from a predictive model of the intrinsic vulnerability index (Schmiing *et al.*, 2014), considering 30 commercial species sampled in UVCs (Supplementary Figure S1). The index is based on life history and ecological characteristics of marine fish, namely maximum body length, age at first maturity, von Bertalanffy growth parameters, natural mortality rate, maximum age, geographic range, annual fecundity, and aggregation behaviour (Cheung *et al.*, 2005, 2007). It ranges from 1 to 100, with 100 being the most vulnerable (Cheung *et al.*, 2005). Long-lived, large-bodied, and slow growing species with late maturity are considered most vulnerable to fishing and have a slow recovery from exploitation (Reynolds *et al.*, 2005; Cheung *et al.*, 2007). The predicted range of the

vulnerability index in the study area was on a scale from 35 to 51 and classified into three categories (low: 35–43, middle: >43–47, high: >47–51, Table 1).

“Biotope features” included spatial predictions for the presence–absence of six dominant macroalgae (articulated corallinaceae, *Codium eslabethae*, *Dictyota* spp., *Halopteris filicina*, *Padina pavonica*, *Zonaria tournefortii*, Table 1, Supplementary Figure S1, from Tempera, 2008; Tempera *et al.*, 2012).

Habitat maps of the two main habitat types, rock and sediment, derived from multibeam surveys, were integrated as “habitat features” in the analysis (Supplementary Figure S1, Tempera, 2008; Tempera *et al.*, 2012). In total, 79 conservation features were available (Table 1, Supplementary Figure S1). The amount of each feature in the existing MPAs was estimated (Table 1).

### Socio-economic data: costs and benefits

The fishing effort was used as a surrogate for the spatial distribution of the non-monetary opportunity cost for different fisheries (i.e. the negative impact an MR might have for fishers; Klein *et al.*, 2008b). Data from standardized spatial annual fishing effort (2 × 2 km grid), estimated via roving creel surveys in 2004/2005 (Diogo, 2007; Diogo and Pereira, 2013), were used for this purpose. During the surveys, a shore-based observer counted the number of spearfishers, shore anglers, recreational, commercial, and unidentified fishing vessels. Additionally, interviews were conducted with the fishers to characterize the catch (Diogo, 2007; Diogo and Pereira, 2013, 2014). The resulting fishing effort grids were refined according to expert knowledge (P. Afonso, H. Diogo, local fishers): (i) spearfishing was restricted to rocky bottom down to the 20 m isobath and the first 40 m of neighbouring sediment, (ii) shore angling was restricted to a 50 m buffer around the coast, and (iii) recreational and commercial boat fishing were restricted to occur outside this 50 m buffer. The four different fishery types were then combined to a single fishing effort layer (Figure 2) using a weighted sum based on the relative importance of each

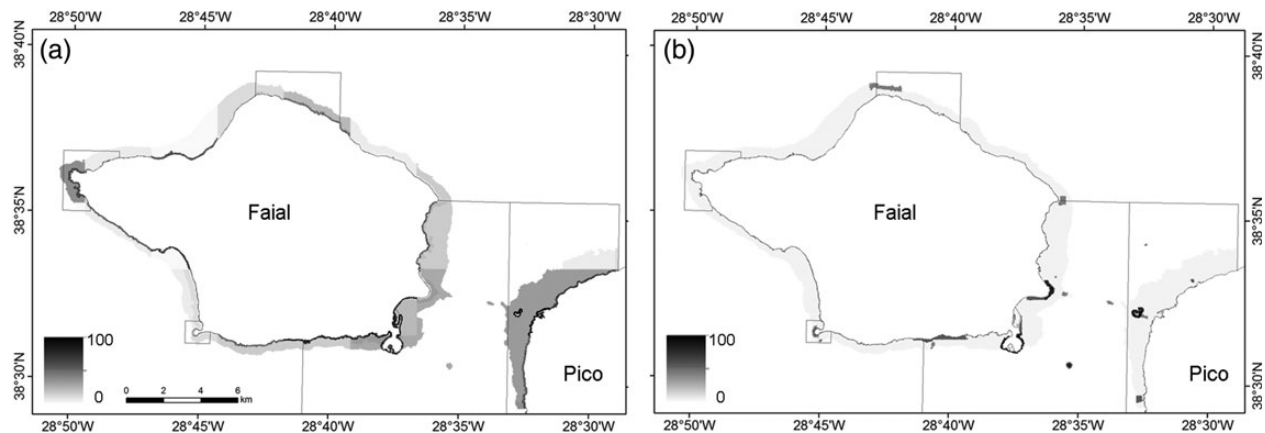

**Figure 2.** Spatial distribution of multiple users' costs and benefits. A relative, standardized scale from 0 to 100 was used to measure the (a) fishing effort,  $F$ , and (b) benefits for recreational, non-extractive activities,  $R$ . See text for further details. The boundaries of the existing MPAs are shown (black rectangles).

activity as a function of the total catch per species in tonnes for the years 2004/2005 (Diogo, 2007; Diogo and Pereira, 2013, 2014). Species that were absent in the UVCs, which were used to produce predictive models and maps, were excluded from these statistics to correct the catch importance. The resulting total fishing effort  $F$ , which ranged from 0 to 72 (standardized number of fishing operations per grid cell), was converted to a standardized, relative scale from 0 to 100.

In addition, a second cost surrogate layer that also considered the potential benefits of MRs for tourism was developed. For this purpose, the importance of recreational, non-extractive human uses, namely scuba diving and glass-bottom boat activity, were estimated via face-to-face interviews with managers of four scuba diving centres and one glass-bottom boat operator in Faial and Pico (see also Ressurreição and Giacomello, 2013). All parts of the study area were grouped into four categories according to the visiting frequency. Classes were then converted to values between 0 and 100 (not visited, 0; least visited, 33.3; regularly visited, 66.6; most frequently visited, 100). These two activities were summed up to a single non-extractive layer, assigning the same importance to both (i.e. to maintain the importance of areas that are only visited by the glass-bottom boat, Figure 2). Non-extractive, recreational activities were considered to benefit from marine conservation. This reflects the current MPA legislation that allows these activities in most of the protected zones, except inside the Caldeirinhas MR.

The non-extractive layer was then combined with the fishing effort layer  $F$  to calculate the total cost  $C$  for each planning unit (PU) of the study area:

$$C = (0.47 \times F - 0.53 \times R) + \alpha,$$

where  $R$  is the benefit for recreational, non-extractive activities in PU  $i$ , and  $\alpha$  a constant for scaling  $C$  to values equal to or higher than zero (i.e. to avoid negative values if the benefit outweighs the fishing effort cost surrogate). Weighting factors were based on the monetary value of landings of coastal fishing activities in 2011 for Faial and Pico Islands (excluding species that were absent in the UVCs, Diogo and Pereira, 2014) and on the estimated monetary value of diving and glass-bottom boat activities in 2011. The revenue of the glass-bottom boat was provided by the operator, and diving revenues were extrapolated using the best data available,

i.e. statistics published by the Regional Statistics Service (SREA, <http://estatistica.azores.gov.pt/>). For this purpose, the expected number of divers was estimated and multiplied by the average price of a coastal dive package. The resulting weighting factors were almost equal, supporting the general notion of the high importance of both (artisanal) fishing (Carvalho *et al.*, 2011a; Pham *et al.*, 2013) and recreational activities in the Azores (Diogo, 2007; Diogo and Pereira, 2013, 2014; Ressurreição and Giacomello, 2013).

### Reserve selection scenarios

The study area was divided into 23 710 hexagonal PUs, each with an area of 2500 m<sup>2</sup>. The software Marxan (version 2.43, Ball *et al.*, 2009) was used to find solutions for a reserve system that achieves *a priori* defined conservation targets for the least costs, the so-called “minimum-set problem” (Possingham *et al.*, 2000; Ball *et al.*, 2009). Marxan uses simulated annealing to mathematically select a set of PUs that achieve the conservation objectives most efficiently. The score of a solution given by Marxan is the sum of the cost of the reserve system, plus its boundary length and a penalty if a conservation feature is not adequately represented in a solution. The boundary length modifier (BLM) modifies the amount of spatial clustering of PUs, and the species penalty factor (SPF) weights the relative importance of each feature (Game and Grantham, 2008).

A total of six reserve selection scenarios were run: three “fisheries scenarios” (FSs) and three “biodiversity scenarios” (BSs; Table 1). FSs analysed potential solutions for reserve networks with fisheries management purposes. They considered only distribution patterns of commercial species, the vulnerability of the commercial fish assemblage to fishing, and reef habitats. In each FS, a total of 56 conservation features were used. The fishing effort layer ( $F$ ) was used as cost surrogate. BSs, on the other hand, analysed solutions for the protection of a wider set of conservation features, considering commercial and non-commercial species, reef and soft-bottom habitats, and algae biotopes as biodiversity surrogates. In each BS, a total of 44 conservation features were used. The total cost  $C$  (combination of the fishing effort  $F$  with the benefits of non-extractive, recreational activities) was used as cost layer.

Three different conservation targets were compared for both scenario types: the (i) “existing protection”—conservation targets were equal to the present protection of all features in the existing MPAs (FS/BS 1); (ii) “minimum protection”—targets increased



with increasing level of each species feature (0, 5, 10, and 15% for low, middle, high, and very high levels of abundance/probability of presence/spawning biomass/potential fecundity) and assemblage feature (5, 10, and 15% for low, middle, high levels of fishing vulnerability) and were 10% for selected habitat or biotope features (FS/BS 2); (iii) “maximum protection”—targets were three times higher than in the minimum protection scenarios (FS/BS 3; Table 1). Targets of FS/BS 2 and FS/BS 3 were adapted from international guidelines recommending the protection of at least 10–30% of each marine biome or habitat (World Parks Congress, 2003; Convention on Biological Diversity, 2010). Minimum protection targets were defined to be at the lower end of this recommended range (10%) and maximum protection targets at the upper extreme (30%). The PUs inside the Caldeirinhas MR were *a priori* set to be included in the reserve selection of all scenarios. The size of this area was defined to be the minimum size of a priority area.

Each Marxan analysis was run with 100 repetitions and a billion iterations using the “Zonae Cogito” interface (version 1.74, Segan et al., 2011). The SPF was set to 1 for all features and the BLM was calibrated for each scenario individually, according to Stewart and Possingham (2005). For this purpose, a range of BLM values were tested and the BLM that resulted in minimization of the boundary length for a small increase in cost was chosen (Table 2). The BLM was further increased to enhance clumping and selection of larger priority areas if solutions included priority areas smaller than the Caldeirinhas reserve.

The selection frequency, or summed solution, describes the number of times each PU was selected over the 100 runs of each scenario. It was analysed as an estimate of the PUs’ irreplaceability (Carwardine et al., 2007), i.e. the priority of protection, and classified into five categories (never selected: 0; no priority: 1–10 selections; low priority: 11–50; medium priority: 51–90; high priority: >90). Best solutions for each scenario were defined according to the lowest objective function score over all 100 runs. Network statistics of all solutions were calculated for: (i) the total extent of the protected area, (ii) the average size of each site, (iii) the number of selected sites, (iv) the mean edge-to-area ratio, (v) the percentage of the coastline integrated in network solutions, and (vi) the shortest linear distance between centres of individual sites. A Kruskal–Wallis test was used to test for differences between the parameters of the six scenarios and the statistics of the existing MPAs. Zones of the present network go beyond the 40 m isobath and thus were adapted to the depth limit of this study. As result, the three offshore

reefs in the channel were considered as separate zones, and the Caldeirinhas reserve was joined to the neighbouring site of the Faial–Pico channel because they share boundaries. The costs of all solutions were compared with each other. For this purpose, the constant  $\alpha$ , multiplied by the number of PUs of a given solution for BS 1–3, was subtracted. In addition, the cost of the existing network was calculated, using both cost surrogate layers ( $F$ ,  $C$ ). Site selection was compared with the existing MPAs by calculating the percentage of PUs that were (i) identified as priority areas for conservation but not included in the existing MPAs, (ii) identified as priority areas and included in the existing MPAs, (iii) not identified as priority areas but included in the existing MPAs, and (iv) not identified as priority areas and not included in the existing MPAs (adapted from Giakoumi et al., 2013).

## Results

Six reserve selection scenarios were produced for the coastal areas of Faial and West-Pico Islands. Solutions for reserve networks are shown in Figure 3 and the selection frequency of the PUs is shown in Supplementary Figure S2. At least one priority area for conservation was selected at the northwest coast of Pico and the northwest coast of Faial, irrespective of the conservation objective and target level (Figure 3). Four of the eight sites of the existing MPAs (Cedros at the north coast of Faial and all three offshore reefs) were never selected in the Marxan solutions.

Network statistics of all scenarios vs. the existing network are summarized in Table 2. The average distance between individual sites was <12 km in all scenarios, irrespective of the conservation objective or target level. The mean edge-to-area ratio of the present MPAs was reduced to 5.01 ( $\pm 2.40$ ) if the three offshore reefs were excluded from the analysis. The Kruskal–Wallis test did not reveal significant differences. Site selection of individual reserves in FSs was visually similar to most of the solutions for BSs with the same conservation target level. Solutions for FS 1 and FS 2 did not consider the “best” solution with the lowest score, but the next best solution that produced a desirable level of compactness (i.e. minimum defined patch size). This was not achieved with a further increase in the BLM. Reserve costs, in general, increased with increasing protection target levels and costs of solutions for FSs were typically higher than of BSs (Table 2). The existing MPA network had the highest overall costs for conservation (Table 2).

**Table 2.** Network statistics, costs, and BLM value of solutions for three FS and BS reserve design scenarios, respectively, derived from Marxan analyses.

| Scenario    | Total area (km <sup>2</sup> ) | % of study area | % of coastline | Number of sites | Mean ind. size (km <sup>2</sup> ) ( $\pm$ SD) | Mean edge-to-area-ratio ( $\pm$ SD) | Mean distance between sites (km) ( $\pm$ SD) | Cost                                          | BLM |
|-------------|-------------------------------|-----------------|----------------|-----------------|-----------------------------------------------|-------------------------------------|----------------------------------------------|-----------------------------------------------|-----|
| FS 1        | 36.0                          | 61              | 52             | 9               | 4.0 ( $\pm$ 4.8)                              | 5.7 ( $\pm$ 3.9)                    | 7.2 ( $\pm$ 4.4)                             | 141 781                                       | 2   |
| FS 2        | 5.9                           | 10              | 11             | 8               | 0.7 ( $\pm$ 0.7)                              | 8.2 ( $\pm$ 4.1)                    | 8.6 ( $\pm$ 7.7)                             | 10 961                                        | 0.6 |
| FS 3        | 17.6                          | 30              | 24             | 8               | 2.2 ( $\pm$ 3.6)                              | 7.0 ( $\pm$ 4.6)                    | 8.0 ( $\pm$ 2.4)                             | 75 034                                        | 3   |
| BS 1        | 35.0                          | 59              | 58             | 8               | 4.4 ( $\pm$ 5.4)                              | 6.1 ( $\pm$ 4.2)                    | 8.0 ( $\pm$ 4.3)                             | 55 415                                        | 4   |
| BS 2        | 5.9                           | 10              | 10             | 6               | 1.0 ( $\pm$ 0.9)                              | 8.7 ( $\pm$ 6.5)                    | 11.5 ( $\pm$ 8.8)                            | 8335                                          | 2   |
| BS 3        | 20.3                          | 34              | 30             | 10              | 2.0 ( $\pm$ 3.2)                              | 9.4 ( $\pm$ 7.7)                    | 6.4 ( $\pm$ 3.0)                             | 37 398                                        | 4   |
| Present MPA | 35.1                          | 60              | 62             | 8               | 4.4 ( $\pm$ 6.3)                              | 14.1 ( $\pm$ 14.9)                  | 8.9 ( $\pm$ 5.5)                             | 209 938 <sup>F</sup> /<br>74 852 <sup>C</sup> | –   |

Conservation targets for FS and BS were defined as (i) equal to the existing protection level, (ii) minimum, and (iii) maximum (see text for detailed description). FSs used the fishing effort ( $F$ ) and BSs a combination of  $F$  and the benefits for recreational, non-extractive activities ( $C$ ) as cost surrogate layer (standardized scales, 0–100). Average values of individual sites are reported, including standard deviations (SD). The comparison to the existing MPA network considering the 40-m-depth limit used in the study is given at the end of the table.

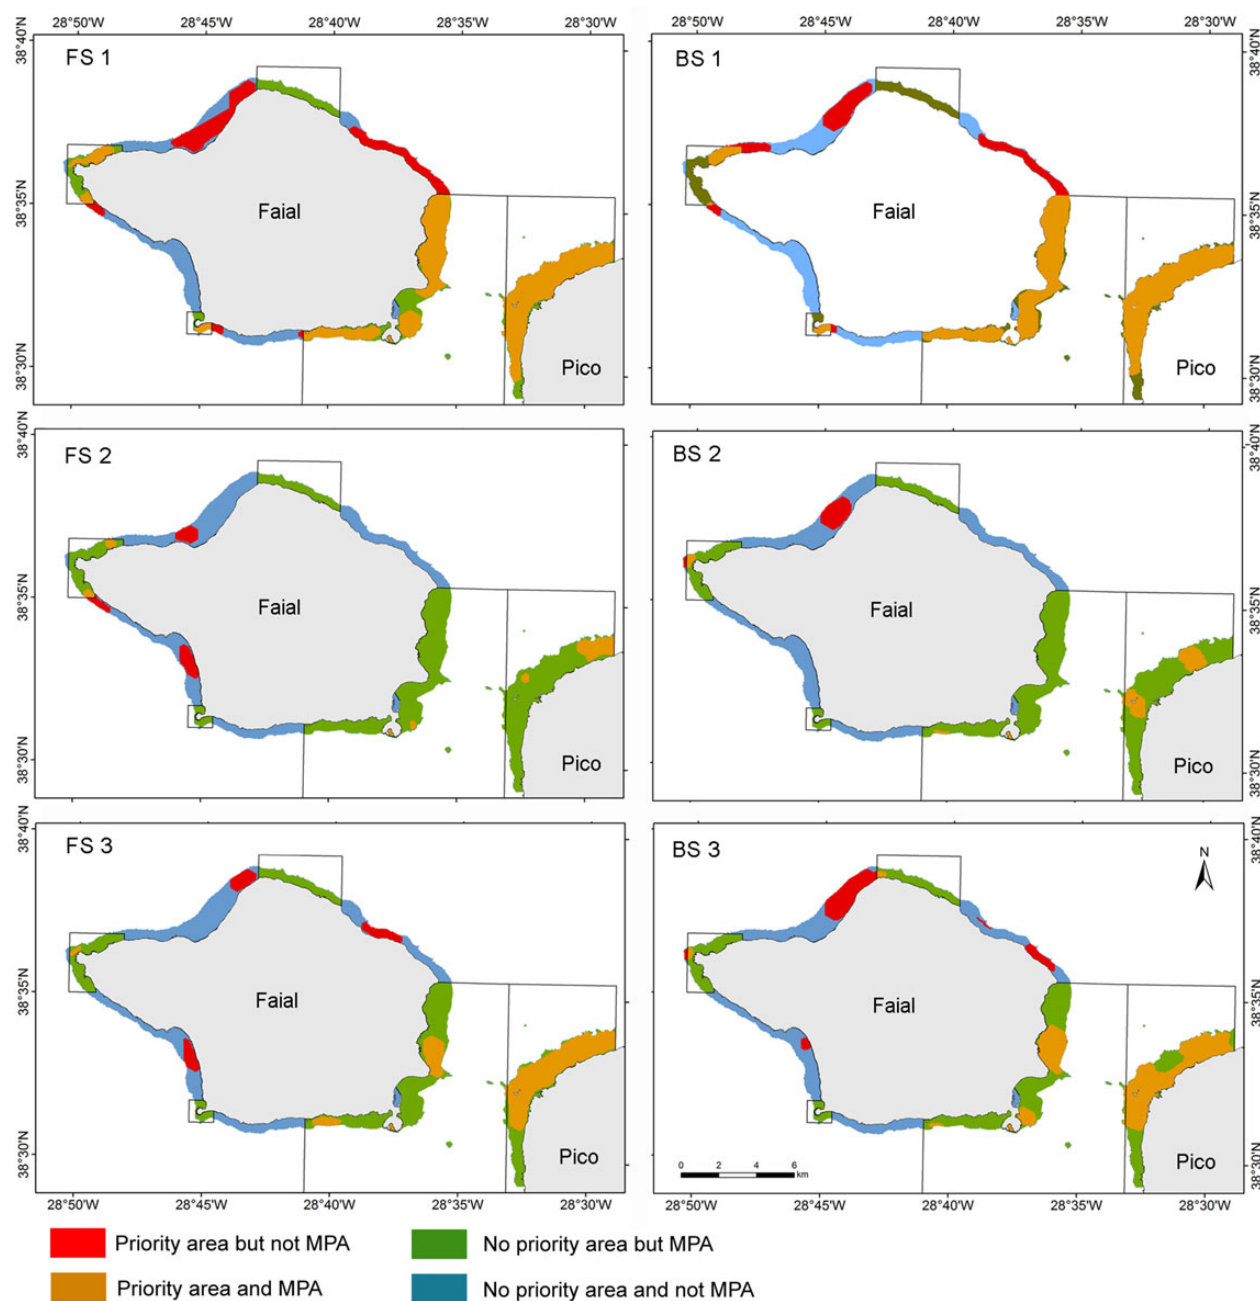

**Figure 3.** Priority areas for conservation in Faial and West-Pico Islands, Azores archipelago, compared with the existing MPA network. Scenarios considered either fisheries management objectives (FSs, left column) or the protection of biodiversity (BS, right column) and had (i) the present, (ii) a minimum, or (iii) maximum protection level as conservation target. Colours indicate the percentage of PUs that were (a) identified as priority areas for conservation but were not included in the existing MPAs (red); (b) identified as priority areas and were included in the existing MPAs (orange); (c) not identified as priority areas but included in the existing MPAs (green); and (d) not identified as priority areas and not included in the existing MPAs (blue; adapted from [Giakoumi et al., 2013](#)). The boundaries of the existing MPAs are shown (black rectangles).

### Fisheries scenarios

The solution for the FS with the existing level of protection as conservation target (FS 1) included the largest total area and average size of individual reserves of all FSs (Table 2). It was comparable to the total and average size of individual sites of the existing MPAs. The spatial overlap between priority sites and the existing MPAs was high (45% of the study area, Figure 3). This solution had the lowest edge-to-area ratio of all scenarios and the highest cost (Table 2). The solution for minimum conservation targets

(FS 2) had the smallest average reserve size and the greatest distances between them. No priority areas were selected at the north (-east) coast of Faial. The spatial overlap between priority sites and the existing MPAs was small (Figure 3). Maximum conservation targets (FS 3) resulted in a solution for a reserve network with the same number of sites, but half the size of the existing MPA network. Reserves were equally distributed around Faial Island. The total cost of FS 3 was estimated at half the cost of FS 1.

## Biodiversity scenarios

The best solution for the BS with the existing level of protection as conservation target (BS 1) resulted in a zoning comparable to the solution for the FS with the same target (FS 1) and to the present network (Figure 3, Table 2). Of all six scenarios, BS 1 included the largest amount of the coastline. Site selection for the conservation of biodiversity under minimum target levels (BS 2) differed compared with FS 2 (Figure 3). The solution included a small total and average reserve size, comprised the lowest percentage of the coastline, had the lowest cost of all scenarios (Table 2), and had a minimal spatial overlap with the existing MPAs (Figure 3). Such smaller solutions exhibited the highest edge-to-area ratios (Table 2). The BS with maximum conservation targets (BS 3) had the lowest edge-to-area ratio of all scenarios and resulted in total and average reserve sizes comparable to the best solution for fisheries objectives under the same protection target level (FS 3, Table 2). Compared with FS 3, BS 3 was less costly by 50% (Table 2).

## Discussion

The effective management and sustainable use of marine resources is essential to minimize conflicts between fisheries, recreation, and conservation. Arguably, reserves chosen opportunistically may be better than no reserves at all (Roberts and Hawkins, 2000), but they may be inefficient and even compromise effective conservation (Stewart et al., 2003).

Six reserve selection scenarios were produced with the systematic conservation planning software Marxan to analyse differences and similarities between solutions for conservation networks with different conservation objectives and protection target levels. Additionally, site selection of an existing network that was designed based on best available (scientific) knowledge, but also opportunistic approaches were assessed and compared with results of systematic conservation planning. Marxan includes or excludes PUs in a reserve scenario, assuming that all conservation features inside the reserve are fully protected (Ball et al., 2009). The existing MPAs, however, in the study area include mainly sites under partial protection and only one very small “no-take” MR. Therefore, conservation features were assumed as fully protected in the current MPA network to compare its design with solutions provided by Marxan.

The importance of the conservation objective was most evident for minimum conservation target levels (FS/BS 2). Although network statistics were comparable, site selection was rather different, particularly around Faial Island. The integration of different conservation features in both scenarios is probably the driving factor behind this pattern and highlights the fact that spatial management needs to be adjusted to the objectives instead of using a “one-size-fits-all” approach. Consequently, a clear formulation of objectives is significant for a successful implementation of reserves (Fernandes et al., 2005; Stelzenmüller et al., 2013). Nevertheless, spatial prioritization in FS 1 and BS 1 (or FS 3 and BS 3), with different conservation objectives but the same target, were quite similar, supporting results of other studies that demonstrate how combined solutions for fisheries management and the protection of biodiversity are feasible (Klein et al., 2008b, 2009; Palumbi et al., 2009; Gaines et al., 2010).

Reserve selection is also largely driven by the target protection level which may even be prevailing. For example, FSs (or biodiversity, respectively) with different protection target level (FS 1–3 or BS 1–3) varied considerably. As anticipated, reserve size increased with increasing conservation target level, whereas the edge-to-area

ratio decreased. The fragmentation or compactness is essential to the functioning of a conservation network (Possingham et al., 2000). MRs, especially small ones, may not equally benefit all species because of their different spatial habitat uses (Kramer and Chapman, 1999; White et al., 2010). Some of the species whose distribution maps were integrated in this study have rather small home ranges, such as *L. bergylta* (Villegas-Ríos et al., 2013), *S. salpa* (Jadot et al., 2006), and *S. cretense* (Afonso et al., 2008b). Minimum conservation targets and small reserves as provided by FS 2 and BS 2 may effectively protect them and other highly sedentary species (Afonso et al., 2011). The size (and shape) of a reserve also influences possible edge effects. The common phenomenon of “fishing the line” (i.e. fishing activity concentrated at the reserve boundary; Kellner et al., 2007; Goñi et al., 2008) will increase with increasing boundary length. This can have considerable negative impacts on fish populations inside and close to reserve boundaries (Kellner et al., 2007). Similarly, with decreasing size of the reserve’s core area, edge-sensitive species can be negatively influenced (Possingham et al., 2000). Remarkably, the mean edge-to-area ratio was up to three times higher in the existing network, although no significant differences were found between solutions. This value, however, is driven by the three small offshore reefs. In general, reserves with smaller edge-to-area ratio are easier to manage and less costly, due to having less boundaries and neighbouring areas (Possingham et al., 2000; Ball et al., 2009). Protection of larger individual sites with small edge-to-area ratio might generate biological or ecological advantages, for example, for more mobile species, such as *Pseudocaranx dentex* (Afonso et al., 2009) and *D. sargus* (Abecasis et al., 2013), but it might also increase conflicts. The number of competing user groups that are affected by the implementation of an MR, most likely increases with increasing reserve size, particularly in coastal areas. Thus, larger reserves might be easier to accept (although harder to enforce) in offshore areas, whereas smaller, more numerous reserves are preferable in coastal regions (Roberts et al., 2005).

Individual reserves also have to be close enough to ensure connectivity, a key aspect of MPA sustainability (Ardron, 2008). Distances between individual sites were probably adequate to promote network connectivity, considering the rather short larval dispersal distances of many reef fish (Jones et al., 2009) and maximum recommended distances between individual reserves of 30 km (McCook et al., 2009).

Marine conservation planning often uses the distribution of species (abundances or occurrences) or habitats to identify priority areas for conservation (e.g. Lourival et al., 2011; Giakoumi et al., 2013). Fish, however, often have varying ontogenetic habitat preferences and may use distinct habitats for their reproduction (e.g. spawning sites, Sala et al., 2003). The integration of spatial patterns of the spawning biomass and the potential fecundity of fish is proposed as surrogate to target these essential habitats in spatial prioritization. Spawning biomass also proved to be a good surrogate for reef fish connectivity (Bode et al., 2012). In addition, the vulnerability of fish to fishing was included as conservation feature to improve protection of most vulnerable assemblages and support their recovery. To the best knowledge, this is a novel approach.

Network statistics of solutions with the existing protection as target level (FS/BS 1) were comparable to the present MPAs. The spatial overlap between priority areas and existing MPAs was high. Thus, the current zoning scheme seems quantitatively adequate. FS 1 and BS 1, however, were less “costly” than the existing MPA. The same conservation objectives could be achieved while reducing



possible negative effects on fisheries. The existing MPAs have high targets for all categories of the conservation features (FS/BS 1), including areas with low fish abundance or reproductive potential (spawning biomass, potential fecundity; i.e. targets >50%). Contrary to FS/BS 1, FS/BS 2 and FS/BS 3 only set highest targets for areas with maximum fish abundance or reproductive potential, because these areas are considered as preferential habitats or potential essential fish habitats (Schmiing *et al.*, 2013). Targets for potentially “low-quality” habitats are minimal to reduce the total reserve size and cost (i.e. the cost was reduced to half). This approach explicitly considers species-specific habitat preferences and integrates them in the reserve selection scenarios by giving more weight (i.e. higher targets) to ecologically or biologically most important areas. Their protection is critical to enhance the reproductive output of a population and the potential subsidy to adjacent habitats and fisheries (Sala *et al.*, 2003; Pelc *et al.*, 2010; Bode *et al.*, 2012).

Importantly, Marxan solutions do offer zoning alternatives that leave out currently protected sites and instead include new sites, particularly in the (north-) west of Faial. Up to 15% of the study area were identified as priority for conservation, but are not included in the current zoning scheme. Site selection of such priority areas was similar in at least half of the scenarios, irrespective of the conservation objective or target (i.e. close to Praia do Norte at the north- and Varadouro at the southwest coast of Faial). This demonstrates the efficiency of systematic conservation planning, i.e. the integration of clear conservation objectives and targets, and spatial patterns of biological, ecological, and socio-economic values to detect potential important gaps in protection. Such areas should receive special attention in adaptive management processes as their protection might improve the ecological functioning of a reserve network.

Marine ecosystems are an important component of the human life, providing food and other resources, but also opportunities for leisure activities. Fishing can be of considerable socio-economic local importance, particularly in small regions (Carvalho *et al.*, 2011b; Pham *et al.*, 2013). In the Azores, as much as 90% of the fishing fleet and half of the catch are attributed to small-scale, artisanal fisheries (Carvalho *et al.*, 2011a). Restricting fishing grounds might negatively impact local communities, thus a balance between the protection of fish assemblages and their exploitation is required. Consequently, the integration of socio-economic values is central for conservation planning to promote the ecological and socio-economic success of reserves, to minimize conflicts with stakeholders, and to consider “real-world” scenarios (Lundquist and Granek, 2005; Klein *et al.*, 2008a, b, 2009; Ressurreição *et al.*, 2012a, b, c). Scenarios presented in this study incorporate not only ecological, but also socio-economic information and certainly will facilitate and promote communication in stakeholder meetings. The approach presents a straightforward method to estimate cost surrogates when (spatial) monetary values are missing. Fishing effort was used as cost surrogate layer, considering commercial and recreational fisheries (Diogo, 2007; Diogo and Pereira, 2013, 2014; Pham *et al.*, 2013). However, it was calculated on a rather large spatial scale compared with the other biological and environmental data. Its refinement, particularly in coastal areas, is a potential future task that probably will improve cost layers for reserve selection scenarios.

Recreational, non-extractive activities (i.e. dive spots and areas for boat-based observations of marine life) were added as benefit to the cost surrogate layer as next step. The combination of both recreational, non-extractive activities with each other was not based on their economic importance (i.e. the glass-bottom boat

was established recently and is still in the initial growth stage), instead equal weights were assigned to maintain the importance of areas that are only visited by the glass bottom boat. The overlap of both areas is very small (<1% of the study area). In the future, it will be necessary to improve the knowledge of the total annual effort and economic value of both activities, which currently have a growing tendency in the region. The protection of important recreational sites was considered as beneficial because it may enhance non-extractive, recreational activities (e.g. Angulo-Valdés and Hatcher, 2010; Ressurreição and Giacomello, 2013). This decision is in accordance with the regional legislation. Non-extractive, recreational activities are currently not forbidden in the existing MPAs, except inside the Caldeirinhas MR. Furthermore, “dive reserves” were implemented in the Azores, and elsewhere, to ban fishing and to promote scuba diving. Such activities depend on the presence and health of natural marine resources and on habitats with a high biodiversity (Rees *et al.*, 2010). Promoting sites with high recreational value also implies possible economic advantages because people pay for recreational activities (Ressurreição and Giacomello, 2013). These incomes can add up to the same economic value as fisheries (Ruiz-Frau *et al.*, 2013). People are also willing to pay for the conservation of marine biodiversity (Ressurreição *et al.*, 2011, 2012b), whereas the valuation of certain marine taxa may reflect cultural differences (Ressurreição *et al.*, 2012c).

To date, there are few examples of MR network design that explicitly integrate opportunity cost for fishing activities with benefits from tourism and related recreational activities (e.g. Watts *et al.*, 2009; Giakoumi *et al.*, 2011, 2012). The present study contributes substantially to this growing literature. BS achieved conservation targets more cost-efficiently than FSs, indicating that more biodiversity features could be conserved when taking into account multiple ocean users (e.g. fishers and scuba divers) who, in turn, could benefit from the implementation of these scenarios. Results suggest that decision-makers should explicitly account for multiple users’ opportunity cost and benefits when designing and implementing MR networks. It is the first time that a systematic conservation planning software is applied in the framework of marine spatial planning in the Azores archipelago and to the best knowledge, only one other study is published for an European island in the Atlantic (García *et al.*, 2010). As such, the presented approach is believed to support the wider context of coastal spatial management, particularly in islands with limited shelf areas, and to deliver strategies for an adaptive management of MPAs.

Future studies may benefit from systematic conservation planning software that does not only differentiate between “protected” and “non-protected” zones, but also between different levels of protection, such as Marxan with Zones (Klein *et al.*, 2009; Watts *et al.*, 2009). This is particularly true for areas that experience multiple uses and restrict extractive uses but not recreational, non-extractive activities, such as in this study. An alternative approach might be to combine the solutions of different scenarios. Sites that were identified with minimum conservation targets were generally small and could be defined as “no-take” areas, whereas sites selected with maximum conservation targets could be designated as partially protected or “buffer” zones.

In conclusion, the presented approach (i) uses systematic conservation planning to assess an existing network of MPAs, (ii) integrates the abundance, reproductive potential and vulnerability to fishing of multispecies, in addition to other environmental and socio-economic criteria, (iii) gives more weight to ecologically significant habitats, (iv) suggests that multiple users’ cost and benefits

should be considered in conservation planning, and (v) identifies possible conservation gaps and produces alternative flexible solutions that aim to facilitate the dialogue between stakeholders and can be used in adaptive management to improve existing conservation networks. It is feasible in any marine region, whereas costs, benefits, conservation features, targets, and objectives can be adapted to meet the particular needs of each planning task.

## Supplementary data

Supplementary material is available at the ICES/MS online version of the manuscript.

## Acknowledgements

We thank Adriana Ressurreição and Natacha Carvalho for assistance in acquiring the data of the scuba diving importance and Ricardo Medeiros for assistance with GIS analyses. We thank two anonymous reviewers for their constructive comments on earlier drafts of the manuscript. Individual financial support of MS was given by the European Marie Curie Research Training Network FREESUBNET (MRTN-CT-2006-036186), the Portuguese Foundation for Science and Technology (FCT; SFRH/BD/66117/2009-COMPETE), and Regional Fund for Science (FRC; M3.1.5/F/168/2012). IMAR-DOP/Uaz is Research and Development Unit no. 531 and LARSyS-Associated Laboratory no. 9 funded by FCT-Pest/OE/EEI/LA0009/2013-Projecto Estratégia LA 9 (LARSyS)-2011–2014-COMPETE and by the Regional Department of Science Services (DSC). This work is a contribution to the project MoniZEC (M2.1.2/I/018/2011).

## References

- Abecasis, D., Bentes, L., Lino, P. G., Santos, M. N., and Erzini, K. 2013. Residency, movements and habitat use of adult white seabream (*Diplodus sargus*) between natural and artificial reefs. *Estuarine, Coastal and Shelf Science*, 118: 80–85.
- Afonso, P., Fontes, J., Holland, K. N., and Santos, R. S. 2008b. Social status determines behaviour and habitat usage in a temperate parrotfish: implications for marine reserve design. *Marine Ecology Progress Series*, 359: 215–227.
- Afonso, P., Fontes, J., Holland, K. N., and Santos, R. S. 2009. Multi-scale patterns of habitat use in a highly mobile reef fish, the white trevally *Pseudocaranx dentex*, and their implications for marine reserve design. *Marine Ecology Progress Series*, 381: 273–286.
- Afonso, P., Fontes, J., and Santos, R. S. 2011. Small marine reserves can offer long term protection to an endangered fish. *Biological Conservation*, 144: 2739–2744.
- Afonso, P., Tempera, F., and Menezes, G. 2008a. Population structure and habitat preferences of red porgy (*Pagrus pagrus*) in the Azores, central north Atlantic. *Fisheries Research*, 93: 338–345.
- Agardy, T., Notarbartolo di Sciara, G., and Christie, P. 2011. Mind the gap: addressing the shortcomings of marine protected areas through large scale marine spatial planning. *Marine Policy*, 35: 226–232.
- Angulo-Valdés, J. A., and Hatcher, B. G. 2010. A new typology of benefits derived from marine protected areas. *Marine Policy*, 34: 635–644.
- Ardron, J. A. 2008. The challenge of assessing whether the OSPAR network of marine protected areas is ecologically coherent. *Hydrobiologia*, 606: 45–53.
- Ball, I. R., Possingham, H. P., and Watts, M. 2009. Marxan and relatives: software for spatial conservation prioritisation. In *Spatial Conservation Prioritisation: Quantitative Methods and Computational Tools*, pp. 185–195. Ed. by A. Moilanen, K. A. Wilson, and H. P. Possingham. Oxford University Press, Oxford. xxi+304 pp.
- Bode, M., Armsworth, P. R., Fox, H. E., and Bode, L. 2012. Surrogates for reef fish connectivity when designing marine protected area networks. *Marine Ecology Progress Series*, 466: 155–166.
- Carvalho, N., Edwards-Jones, G., and Isidro, E. 2011a. Defining scale in fisheries: small versus large-scale fishing operations in the Azores. *Fisheries Research*, 109: 360–369.
- Carvalho, N., Rege, S., Fortuna, M., Isidro, E., and Edwards-Jones, G. 2011b. Estimating the impacts of eliminating fisheries subsidies on the small island economy of the Azores. *Ecological Economics*, 70: 1822–1830.
- Carwardine, J., Rochester, W. A., Richardson, K. S., Williams, K. J., Pressey, R. L., and Possingham, H. P. 2007. Conservation planning with irreducibility: does the method matter? *Biodiversity and Conservation*, 16: 245–258.
- Cheung, W. W. L., Pitcher, T. J., and Pauly, D. 2005. A fuzzy logic expert system to estimate intrinsic extinction vulnerability of marine fishes to fishing. *Biological Conservation*, 124: 97–111.
- Cheung, W. W. L., Watson, R., Morato, T., Pitcher, T. J., and Pauly, D. 2007. Intrinsic vulnerability in the global fish catch. *Marine Ecology Progress Series*, 333: 1–12.
- Coll, M., Piroddi, C., Steenbeek, J., Kaschner, K., Lasram, F. B. R., Aguzzi, J., Ballesteros, E., et al. 2010. The biodiversity of the Mediterranean Sea: estimates, patterns, and threats. *PLoS ONE*, 5: e11842.
- Compton, T. J., Morrison, M. A., Leathwick, J. R., and Carlines, G. D. 2012. Ontogenetic habitat associations of a demersal fish species, *Pagrus auratus*, identified using boosted regression trees. *Marine Ecology Progress Series*, 462: 219–230.
- Convention on Biological Diversity. 2010. Decision X/2—The Strategic Plan for Biodiversity 2011–2020 and the Aichi Biodiversity Targets. Tenth Meeting of the Conference of the Parties to the Convention on Biological Diversity, Nagoya, Aichi Prefecture, Japan.
- Diogo, H., and Pereira, J. G. 2013. Recreational boat fishing pressure on fish communities of the shelf and shelf-break of Faial and Pico Islands (Azores Archipelago): implications for coastal resource management. *Acta Ichthyologica et Piscatoria*, 43: 267–276.
- Diogo, H., and Pereira, J. G. 2014. Assessing the potential biological implications of recreational inshore fisheries on sub-tidal fish communities of Azores (north-east Atlantic Ocean) using catch and effort data. *Journal of Fish Biology*, 84: 952–970.
- Diogo, H. M. C. 2007. Contribution to the characterization of recreational fishing activities on the islands of Faial and Pico, Azores. MSc Thesis, University of the Azores. 99 pp.
- Fernandes, L., Day, J., Lewis, A., Slegers, S., Kerrigan, B., Breen, D., Cameron, D., et al. 2005. Establishing representative no-take areas in the Great Barrier Reef: large scale implementation of theory on marine protected areas. *Conservation Biology*, 19: 1733–1744.
- Fontes, J., Caselle, J. E., Afonso, P., and Santos, R. S. 2009. Multi-scale recruitment patterns and effects on local population size of a temperate reef fish. *Journal of Fish Biology*, 75: 1271–1286.
- Gaines, S. D., White, C., Carr, M. H., and Palumbi, S. R. 2010. Designing marine reserve networks for both conservation and fisheries management. *Proceedings of the National Academy of Sciences of the United States of America*, 107: 18286–18293.
- Game, E. T., and Grantham, H. S. 2008. Marxan User Manual: For Marxan Version 1.8.10. University of Queensland, St. Lucia, Queensland, Australia, and Pacific Marine Analysis and Research Association, Vancouver, British Columbia, Canada. 127 pp.
- García, L. M., Sangil, C., Concepción, L., de León, R. F., Diez, J. B., and Rodríguez, I. Y. G. 2010. Geographical information systems (GIS) as a tool for the environmental evaluation and management of the coastal area of Tazacorte, La Palma (Canary Islands, Spain). In *Geographic Technologies Applied to Marine Spatial Planning and Integrated Coastal Zone Management*, pp. 53–60. Ed. by H. Calado, and A. Gil. CIGPT—Centro de Informação Geográfica e Planeamento Territorial, University of the Azores, Ponta Delgada. 164 pp.

- Giakoumi, S., Grantham, H. S., Kokkoris, G. D., and Possingham, H. P. 2011. Designing a network of marine reserves in the Mediterranean Sea with limited socio-economic data. *Biological Conservation*, 144: 753–763.
- Giakoumi, S., Katsanevakis, S., Vassilopoulou, V., Panayotidis, P., Kavadas, S., Issaris, Y., Kokkali, A., *et al.* 2012. Could European marine conservation policy benefit from systematic conservation planning? *Aquatic Conservation: Marine and Freshwater Ecosystems*, 22: 762–775.
- Giakoumi, S., Sini, M., Gerovasileiou, V., Mazor, T., Beher, J., Possingham, H. P., Abdulla, A., *et al.* 2013. Ecoregion-based conservation planning in the Mediterranean: dealing with large-scale heterogeneity. *PLoS ONE*, 8: e76449.
- Gladstone, W. 2007. Requirements for marine protected areas to conserve the biodiversity of rocky reef fishes. *Aquatic Conservation: Marine and Freshwater Ecosystems*, 17: 71–87.
- Goni, R., Adlerstein, S., Alvarez-Berastegui, D., Forcada, A., Reñones, O., Criquet, G., Polti, S., *et al.* 2008. Spillover from six western Mediterranean marine protected areas: evidence from artisanal fisheries. *Marine Ecology Progress Series*, 366: 159–174.
- Guisan, A., and Zimmermann, N. E. 2000. Predictive habitat distribution models in ecology. *Ecological Modelling*, 135: 147–186.
- Harrison, H. B., Williamson, D. H., Evans, R. D., Almany, G. R., Thorrold, S. R., Russ, G. R., Feldheim, K. A., *et al.* 2012. Larval export from marine reserves and the recruitment benefit for fish and fisheries. *Current Biology*, 22: 1023–1028.
- IUCN, 1994. Guidelines for Protected Area Management Categories. CNPPA with the assistance of WCMC. IUCN, Gland, Switzerland and Cambridge, UK. x+261 pp.
- Jadot, C., Donnay, A., Acolas, M. L., Cornet, Y., and Anras, M. L. B. 2006. Activity patterns, home-range size, and habitat utilization of *Sarpa salpa* (Teleostei: Sparidae) in the Mediterranean Sea. *ICES Journal of Marine Science*, 63: 128–139.
- Jones, G. P., Almany, G. R., Russ, G. R., Sale, P. F., Steneck, R. S., van Oppen, M. J. H., and Willis, B. L. 2009. Larval retention and connectivity among populations of corals and reef fishes: history, advances and challenges. *Coral Reefs*, 28: 307–325.
- Kaplan, D. M., and Botsford, L. W. 2005. Effects of variability in spacing of coastal marine reserves on fisheries yield and sustainability. *Canadian Journal of Fisheries and Aquatic Sciences*, 62: 905–912.
- Kellner, J. B., Tetreault, I., Gaines, S. D., and Nisbet, R. M. 2007. Fishing the line near marine reserves in single and multispecies fisheries. *Ecological Applications*, 17: 1039–1054.
- Klein, C. J., Chan, A., Kircher, L., Cundiff, A. J., Gardner, N., Hrovat, Z., Scholz, A., *et al.* 2008b. Striking a balance between biodiversity conservation and socioeconomic viability in the design of marine protected areas. *Conservation Biology*, 33: 691–700.
- Klein, C. J., Steinbeck, C., Scholz, A. J., and Possingham, H. P. 2008a. Effectiveness of marine reserve networks in representing biodiversity and minimizing impact to fishermen: a comparison of two approaches used in California. *Conservation Letters*, 1: 44–51.
- Klein, C. J., Steinbeck, C., Watts, M., Scholz, A. J., and Possingham, H. P. 2009. Spatial marine zoning for fisheries and conservation. *Frontiers in Ecology and the Environment*, 8: 349–353.
- Kramer, D. L., and Chapman, M. R. 1999. Implications of fish home range size and relocation for marine reserve function. *Environmental Biology of Fishes*, 55: 65–79.
- Little, L. R., Smith, A. D. M., McDonald, A. D., Punt, A. E., Mapstone, B. D., Pantus, F., and Davies, C. R. 2005. Effects of size and fragmentation of marine reserves and fisher infringement on the catch and biomass of coral trout, *Plectropomus leopardus*, on the Great Barrier Reef, Australia. *Fisheries Management and Ecology*, 12: 177–188.
- Lourival, R., Watts, M., Pressey, R. L., de Miranda Mourão, G., Padovani, C. R., Pereira da Silva, M., and Possingham, H. P. 2011. What is missing in biosphere reserves accountability? *Natureza & Conservação*, 9: 160–178.
- Lundquist, C. J., and Granek, E. F. 2005. Strategies for successful marine conservation: integrating socioeconomic, political, and scientific factors. *Conservation Biology*, 19: 1771–1778.
- Margules, C. R., and Pressey, R. L. 2000. Systematic conservation planning. *Nature*, 405: 243–253.
- McCook, L. J., Almany, G. R., Berumen, M. L., Day, J. C., Green, A. L., Jones, G. P., Leis, J. M., *et al.* 2009. Management under uncertainty: guide-lines for incorporating connectivity into the protection of coral reefs. *Coral Reefs*, 28: 353–366.
- Morato, T., Afonso, P., Lourinho, P., Barreiros, J. P., Santos, R. S., and Nash, R. D. M. 2001. Length–weight relationships for 21 coastal fish species of the Azores, north-eastern Atlantic. *Fisheries Research*, 5: 297–302.
- Morato, T., Afonso, P., Lourinho, P., Nash, R. D. M., and Santos, R. S. 2003. Reproductive biology and recruitment of the white sea bream in the Azores. *Journal of Fish Biology*, 63: 59–72.
- OSPAR, 2007. Background document to support the assessment of whether the OSPAR network of marine protected areas is ecologically coherent. *OSPAR Biodiversity Series*, 320. 54 pp.
- Palumbi, S. R., Sandifer, P. A., Allan, J. D., Beck, M. W., Fautin, D. G., Fogarty, M. J., Halpern, B. S., *et al.* 2009. Managing for ocean biodiversity to sustain marine ecosystem services. *Frontiers in Ecology and the Environment*, 7: 204–211.
- Pauly, D., Watson, R., and Alder, J. 2005. Global trends in world fisheries: impacts on marine ecosystems and food security. *Philosophical Transactions of the Royal Society B*, 360: 5–12.
- Pelc, R. A., Warner, R. R., Gaines, S. D., and Paris, C. B. 2010. Detecting larval export from marine reserves. *Proceedings of the National Academy of Sciences of the United States of America*, 107: 18266–18271.
- Pham, C. K., Canha, A., Diogo, H., Pereira, J. G., Prieto, R., and Morato, T. 2013. Total marine fishery catch for the Azores (1950–2010). *ICES Journal of Marine Science*, 70: 564–577.
- Possingham, H., Ball, I., and Andelman, S. 2000. Mathematical methods for identifying representative reserve networks. *In* *Quantitative Methods for Conservation Biology*, pp. 291–305. Ed. by S. Ferson, and M. Burgman. Springer, New York. 322 pp.
- Rees, S. E., Rodwell, L. D., Attrill, M. J., Austen, M. C., and Mangi, S. C. 2010. The value of marine biodiversity to the leisure and recreation industry and its application to marine spatial planning. *Marine Policy*, 34: 868–875.
- Ressurreição, A., and Giacomello, E. 2013. Quantifying the direct use value of Condor seamount. *Deep Sea Research II: Topical Studies in Oceanography*, 98 (Part A): 209–217.
- Ressurreição, A., Gibbons, J., Dentinho, T. P., Kaiser, M., Santos, R. S., and Edwards-Jones, G. 2011. Economic valuation of species loss in the open sea. *Ecological Economics*, 70: 729–739.
- Ressurreição, A., Gibbons, J., Kaiser, M., Dentinho, T. P., Zarzycki, T., Bentley, C., Austen, M., *et al.* 2012c. Different cultures, different values: the role of cultural variation in public's willingness to pay for marine species conservation. *Biological Conservation*, 145: 148–159.
- Ressurreição, A., Simas, A., Santos, R. S., and Porteiro, F. 2012a. Resident and expert opinions on marine related issues: implications for the ecosystem approach. *Ocean and Coastal Management*, 69: 243–254.
- Ressurreição, A., Zarzycki, T., Kaiser, M., Edwards-Jones, G., Dentinho, T. P., Santos, R. S., and Gibbons, J. 2012b. Towards an ecosystem approach for understanding public values for marine biodiversity loss. *Marine Ecology Progress Series*, 467: 15–28.
- Reynolds, J. D., Dulvy, N. K., Goodwin, N. B., and Hutchings, J. A. 2005. Biology of extinction risk in marine fishes. *Proceedings of the Royal Society B*, 272: 2337–2344.
- Roberts, C. M., and Hawkins, J. P. 2000. Fully-protected marine reserves: a guide. WWF Endangered Seas Campaign, Washington, DC, USA and Environment Department, University of York, York, UK.

- Roberts, C. M., Hawkins, J. P., and Gell, F. R. 2005. The role of marine reserves in achieving sustainable fisheries. *Philosophical Transactions of the Royal Society B*, 360: 123–132.
- Ruiz-Frau, A., Hinz, H., Edwards-Jones, G., and Kaiser, M. J. 2013. Spatially explicit economic assessment of cultural ecosystem services: non-extractive recreational uses of the coastal environment related to marine biodiversity. *Marine Policy*, 38: 90–98.
- Russ, G. R. 2002. Yet another review of marine reserves as reef fishery management tools. *In* *Coral Reef Fishes: Dynamics and Diversity in a Complex Ecosystem*, pp. 421–443. Ed. by P. F. Sale. Academic Press, San Diego. 549 pp.
- Sala, E., Aburto-Oropeza, O., Paredes, G., and Thompson, G. 2003. Spawning aggregations and reproductive behavior of reef fishes in the Gulf of California. *Bulletin of Marine Science*, 72: 103–121.
- Sala, E., Costello, C., Dougherty, D., Heal, G., Kelleher, K., Murray, J. H., Rosenberg, A. A., *et al.* 2013. A general business model for marine reserves. *PLoS ONE*, 8: e58799. doi:10.1371/journal.pone.0058799.
- Sala, E., and Knowlton, N. 2006. Global marine biodiversity trends. *Annual Review of Environment and Resources*, 31: 93–122.
- Santos, R. S., Hawkins, S., Monteiro, L. R., Alves, M., and Isidro, E. J. 1995. Marine research, resources and conservation in the Azores. *Aquatic Conservation*, 5: 311–354.
- Schmiing, M., Afonso, P., Tempera, F., and Santos, R. S. 2013. Predictive habitat modelling of reef fishes with contrasting life histories. *Marine Ecology Progress Series*, 474: 201–216.
- Schmiing, M., Diogo, H., Santos, R. S., and Afonso, P. 2014. Assessing hotspots within hotspots to conserve biodiversity and support fisheries management. *Marine Ecology Progress Series*, 513: 187–199.
- Segan, D. B., Game, E. T., Watts, M. E., Stewart, R. R., and Possingham, H. P. 2011. An interoperable decision support tool for conservation planning. *Environmental Modelling & Software*, 26: 1434–1441.
- Stelzenmüller, V., Breen, P., Stamford, T., Thomsen, F., Badalamenti, F., Borja, Á., Buhl-Mortensen, L., *et al.* 2013. A generic framework for implementation of ecosystem based marine management and its application. *Marine Policy*, 37: 149–164.
- Stewart, R. R., Noyce, T., and Possingham, H. P. 2003. Opportunity cost of ad hoc marine reserve design decisions: an example from South Australia. *Marine Ecology Progress Series*, 253: 25–38.
- Stewart, R. R., and Possingham, H. P. 2005. Efficiency, costs and trade-offs in marine reserve system design. *Environmental Modeling and Assessment*, 10: 203–213.
- Stobart, B., Warwick, R., González, C., Mallol, S., Díaz, D., Reñones, O., and Goñi, R. 2009. Long-term and spillover effects of a marine protected area on an exploited fish community. *Marine Ecology Progress Series*, 384: 47–60.
- Tempera, F. 2008. Benthic habitats of the extended Faial island shelf and their relationship to geologic, oceanographic and infralittoral biologic features. PhD thesis, University of St Andrews, St Andrews, UK. <http://research-repository.st-andrews.ac.uk/handle/10023/726>.
- Tempera, F., McKenzie, M., Bashmachnikov, I., Puotinen, M., Santos, R. S., and Bates, R. 2012. Predictive modelling of dominant macroalgae abundance on temperate island shelves (Azores, Northeast Atlantic). *In* *Seafloor Geomorphology as Benthic Habitat: Geohab Atlas of Seafloor Geomorphic Features and Benthic Habitats*, pp. 169–182. Ed. by P. T. Harris, and E. K. Baker, Elsevier Insights, London. 936 pp.
- Vandeperre, V., Higgins, R. M., Sánchez-Meca, J., Maynou, F., Goñi, R., Martín-Sosa, P., Pérez-Ruza, A., *et al.* 2011. Effects of no-take area size and age of marine protected areas on fishery yields: a meta-analytical approach. *Fish and Fisheries*, 12: 412–426.
- Villegas-Ríos, D., Alós, J., March, D., Palmer, M., Mucientes, G., and Saborido-Rey, F. 2013. Home range and diel behavior of the ballan wrasse, *Labrus bergylta*, determined by acoustic telemetry. *Journal of Sea Research*, 80: 61–71.
- Watson, J. E. M., Grantham, H., Wilson, K. A., and Possingham, H. P. 2011. Systematic conservation planning: past, present and future. *In* *Conservation Biogeography*, pp. 136–160. Ed. by R. J. Ladle, and R. J. Whittaker. Wiley-Blackwell, Oxford. 301 pp.
- Watts, M. E., Ball, I. R., Stewart, R. S., Klein, C. J., Wilson, K., Steinback, C., Lourival, R., *et al.* 2009. Marxan with zones: software for optimal conservation based land- and sea-use zoning. *Environmental Modelling & Software*, 24: 1513–1521.
- White, J. W., Botsford, L. W., Moffitt, E. A., and Fischer, D. T. 2010. Decision analysis for designing marine protected areas for multiple species with uncertain fishery status. *Ecological Applications*, 20: 1523–1541.
- World Parks Congress. 2003. Recommendation V.22: building a global system of marine and coastal protected area networks. Vth IUCN World Parks Congress. IUCN, Durban, South Africa.

Handling editor: Marta Coll
